# Supplementary material for: The Expression Pattern of Bcl-2 and Bax in the Tumor and Stromal Cells in Colorectal Carcinoma
Source: MDPI journal article supplement (doi:10.3390/medicina58081135), 2022-08-21
Supplement: s1 [file s1]

# Supplementary Materials: The Expression Pattern of Bcl-2 and Bax in the Tumor and Stromal Cells in Colorectal Carcinoma

| PHD      | SEX | AGE | MSI | SIDE | GRADE | K-RAS | N-RAS | BRAF |
|----------|-----|-----|-----|------|-------|-------|-------|------|
| 1974/21  | M   | 43  | H   | D    | H     | NO    | NO    | NO   |
| 3280/19  | M   | 75  | S   | D    | H     | NO    | NO    | NO   |
| 3126/19  | F   | 74  | H   | D    | H     | NO    | NO    | NO   |
| 2111/20  | M   | 52  | S   | D    | H     | YES   | NO    | NO   |
| 55/20    | F   | 49  | S   | D    | H     | NO    | NO    | YES  |
| 1785/20  | M   | 83  | H   | D    | H     | NO    | NO    | YES  |
| 2251/21  | M   | 78  | H   | D    | L     | NO    | NO    | NO   |
| 2727/21  | F   | 66  | S   | D    | L     | NO    | NO    | YES  |
| 682/21   | M   | 57  | H   | L    | L     | NO    | NO    | NO   |
| 1196/21  | F   | 65  | H   | D    | L     | YES   | NO    | NO   |
| 1109/20  | F   | 48  | S   | D    | H     | NO    | NO    | YES  |
| 3944/20  | M   | 62  | H   | D    | L     | NO    | NO    | NO   |
| 35/21    | F   | 73  | H   | D    | L     | NO    | NO    | NO   |
| 1689/19  | M   | 57  | H   | D    | L     | NO    | YES   | NO   |
| 4744/19  | F   | 81  | H   | D    | H     | NO    | NO    | NO   |
| 2264/20  | F   | 34  | H   | D    | H     | NO    | NO    | NO   |
| 1245/21  | M   | 39  | H   | L    | L     | YES   | NO    | NO   |
| 2485/21  | F   | 67  | H   | D    | L     | YES   | NO    | NO   |
| 7567/20  | F   | 69  | H   | D    | L     | NO    | NO    | YES  |
| 9964/18  | M   | 73  | S   | L    | H     | NO    | NO    | NO   |
| 9406/20  | M   | 83  | S   | D    | H     | NO    | NO    | NO   |
| 10957/21 | F   | 54  | H   | D    | L     | NO    | NO    | NO   |
| 2522/20  | M   | 51  | H   | D    | H     | NO    | NO    | NO   |
| 17086/19 | F   | 74  | H   | D    | H     | NO    | NO    | NO   |
| 12661/18 | F   | 65  | H   | D    | H     | NO    | NO    | NO   |
| 21075/19 | M   | 58  | H   | D    | L     | YES   | NO    | NO   |
| 6776/18  | M   | 72  | H   | L    | H     | NO    | NO    | NO   |
| 15502/19 | F   | 80  | H   | D    | H     | YES   | NO    | NO   |
| 6930/21  | F   | 77  | S   | D    | H     | NO    | NO    | YES  |
| 20210/21 | F   | 63  | H   | D    | H     | NO    | NO    | NO   |
| 15796/20 | M   | 71  | H   | D    | H     | NO    | NO    | NO   |
| 246/20   | M   | 55  | S   | D    | L     | NO    | NO    | NO   |
| 12269/21 | F   | 43  | S   | L    | L     | YES   | NO    | NO   |
| 2149/16  | F   | 82  | S   | L    | L     | NO    | YES   | NO   |
| 8047/21  | F   | 76  | S   | R    | L     | NO    | NO    | NO   |
| 13782/20 | M   | 82  | S   | R    | H     | YES   | NO    | NO   |
| 11843/21 | M   | 68  | S   | L    | L     | NO    | NO    | NO   |
| 118/21   | F   | 62  | S   | R    | L     | NO    | NO    | NO   |
| 10096/20 | F   | 59  | S   | D    | L     | NO    | NO    | YES  |
